# Supplementary material
Source: PubMed Central journal article supplement (PMC8216101)
Supplement: NIHMS1591738-supplement-Supplementary.pdf [file NIHMS1591738-supplement-Supplementary.pdf]

# An Image-Based 384-Well High-Throughput Screening Method for the Discovery of Biofilm Inhibitors in *Vibrio cholerae*.

## SUPPORTING INFORMATION

Kelly C. Peach,<sup>†</sup> Walter M. Bray,<sup>†,‡</sup> Nicholas J. Shikuma,<sup>‡</sup> Nadine C. Gassner,<sup>†,‡</sup> R.  
Scott Lokey,<sup>†,‡</sup> Fitnat H. Yildiz,<sup>‡</sup> Roger G. Linington,<sup>†,\*</sup>

Department of Chemistry and Biochemistry, University of California Santa Cruz, 1156  
High Street, Santa Cruz, CA 95064.

Department of Microbiology and Environmental Toxicology, University of California  
Santa Cruz, 1156 High Street, Santa Cruz, CA 95064.

University of California Santa Cruz Chemical Screening Center, 1156 High Street, Santa  
Cruz, CA 95064.

<sup>†</sup> Department of Chemistry and Biochemistry

<sup>‡</sup> Department of Microbiology and Environmental Toxicology

<sup>‡</sup> University of California Santa Cruz Chemical Screening Center

\*Corresponding Author: [rogerl@chemistry.ucsc.edu](mailto:rogerl@chemistry.ucsc.edu)

## Table of Contents

|                                                       |     |
|-------------------------------------------------------|-----|
| Table of <i>V. cholerae</i> strains.....              | S3  |
| Structural diversity hit set structures.....          | S4  |
| Plot of structural diversity set hits.....            | S6  |
| Table of structural diversity set hits.....           | S7  |
| Natural product set hit structures.....               | S8  |
| Plot of natural product set hits.....                 | S9  |
| Table of natural product set hits.....                | S10 |
| Mechanistic set hit structures.....                   | S11 |
| Plot of mechanistic set hits.....                     | S12 |
| Table of mechanistic set hits.....                    | S13 |
| Challenge set hit structures.....                     | S14 |
| Plot of challenge set hits.....                       | S15 |
| Table of challenge set hits.....                      | S16 |
| Mefloquine substructure search result structures..... | S17 |
| Plot of mefloquine substructure results.....          | S18 |
| Table of mefloquine substructure results.....         | S19 |

**Supplementary Table S1:** List of All Bacterial Mutant Strains.

| Strain     | Genotype                                                                                               |
|------------|--------------------------------------------------------------------------------------------------------|
| Fy_Vc_2    | <i>Vibrio cholerae</i> O1 El Tor A1552, rugose variant, Rif <sup>r</sup> <sup>1</sup>                  |
| Fy_Vc_240  | Fy_Vc_2 mTn7-GFP, Rif <sup>r</sup> Gm <sup>r</sup> <sup>2</sup>                                        |
| Fy_Vc_234  | Fy_Vc_2 $\Delta vps$ -I, rugose variant with deletion of <i>vpsA-K</i> , Rif <sup>r</sup> <sup>3</sup> |
| Fy_Vc_519  | Fy_Vc_234 mTn7-GFP, Rif <sup>r</sup> Gm <sup>r</sup>                                                   |
| Fy_Vc_105  | Fy_Vc_2 $\Delta rbmA$ , Rif <sup>r</sup> <sup>4</sup>                                                  |
| Fy_Vc_224  | Fy_Vc_105 mTn7-GFP, Rif <sup>r</sup> Gm <sup>r</sup> <sup>4</sup>                                      |
| Fy_Vc_1400 | Fy_Vc_2 $\Delta rbmC \Delta bap1$ , Rif <sup>r</sup> <sup>5</sup>                                      |
| Fy_Vc_1395 | Fy_Vc_1400 mTn7-GFP, Gm <sup>r</sup> <sup>5</sup>                                                      |
| Fy_Vc_5    | Fy_Vc_2 $\Delta vpsT \Delta lacZ$ , Rif <sup>r</sup> <sup>6</sup>                                      |
| Fy_Vc_1956 | Fy_Vc_5 mTn7-GFP, Rif <sup>r</sup> Gm <sup>r</sup> <sup>2</sup>                                        |
| Fy_Vc_6    | Fy_Vc_2 $\Delta vpsR \Delta lacZ$ , Rif <sup>r</sup> <sup>6</sup>                                      |
| Fy_Vc_1955 | Fy_Vc_6 mTn7-GFP, Rif <sup>r</sup> Gm <sup>r</sup> <sup>2</sup>                                        |
| Fy_Vc_1745 | Fy_Vc_2 $\Delta vpvC$ , Rif <sup>r</sup> <sup>7</sup>                                                  |
| Fy_Vc_1224 | Fy_Vc_1745 mTn7-GFP, Rif <sup>r</sup> Gm <sup>r</sup> <sup>2</sup>                                     |
| Fy_Vc_345  | Fy_Vc_2 $\Delta cdgC$ , Rif <sup>r</sup> <sup>7</sup>                                                  |
| Fy_Vc_361  | Fy_Vc_345 mTn7-GFP, Gm <sup>r</sup> , Rif <sup>r</sup> <sup>7</sup>                                    |

<sup>1</sup> Yildiz, F. H., Schoolnik, G. K. (1999) *Vibrio cholerae* O1 El Tor: identification of a gene cluster required for the rugose colony type, exopolysaccharide production, chlorine resistance, and biofilm formation. *Proc. Natl. Acad. Sci. USA* 96, 4028-4033.

<sup>2</sup> Beyhan, S., Bilecen, K., Salama, S. R., Casper-Lindley, C., Yildiz, F. H. (2007) Regulation of rugosity and biofilm formation in *Vibrio cholerae*: comparison of VpsT and VpsR regulons and epistasis analysis of *vpsT*, *vpsR*, and *hapR*, *J. Bacteriol.* 189, 388-402.

<sup>3</sup> Beyhan, S., Yildiz, F. H. (2007) Smooth to rugose phase variation in *Vibrio cholerae* can be mediated by a single nucleotide change that targets c-di-GMP signalling pathway, *Mol. Microbiol.* 63, 995-1007.

<sup>4</sup> Fong, J. C. N., Karplus, K., Schoolnik, G. K., Yildiz, F. H. (2006) Identification and characterization of RbmA, a novel protein required for the development of rugose colony morphology and biofilm structure in *Vibrio cholerae*, *J. Bacteriol.* 188, 1049-1059.

<sup>5</sup> Fong, J. C. N., Yildiz, F. H. (2007) The *rbmBCDEF* gene cluster modulates development of rugose colony morphology and biofilm formation in *Vibrio cholerae*, *J. Bacteriol.* 189, 2319-2330.

<sup>6</sup> Casper-Lindley, C., Yildiz, F. H. (2004) VpsT is a transcriptional regulator required for expression of *vps* biosynthesis genes and the development of rugose colonial morphology in *Vibrio cholerae* O1 El Tor, *J. Bacteriol.* 186, 1574-1578.

<sup>7</sup> Lim, B., Beyhan, S., Meir, J., Yildiz, F. H. (2006) Cyclic-di-GMP signal transduction systems in *Vibrio cholerae*: modulation of rugosity and biofilm formation, *Mol. Microbiol.* 60, 331-348.

**Supplementary Figure S1:** Structures of Antibiotic Leads from the NCI Structural Diversity Set.

**Structural Diversity Set Antibiotics:**

**Normalized Percent Biofilm Less than 0.2  
Normalized OD Less than 0.7**

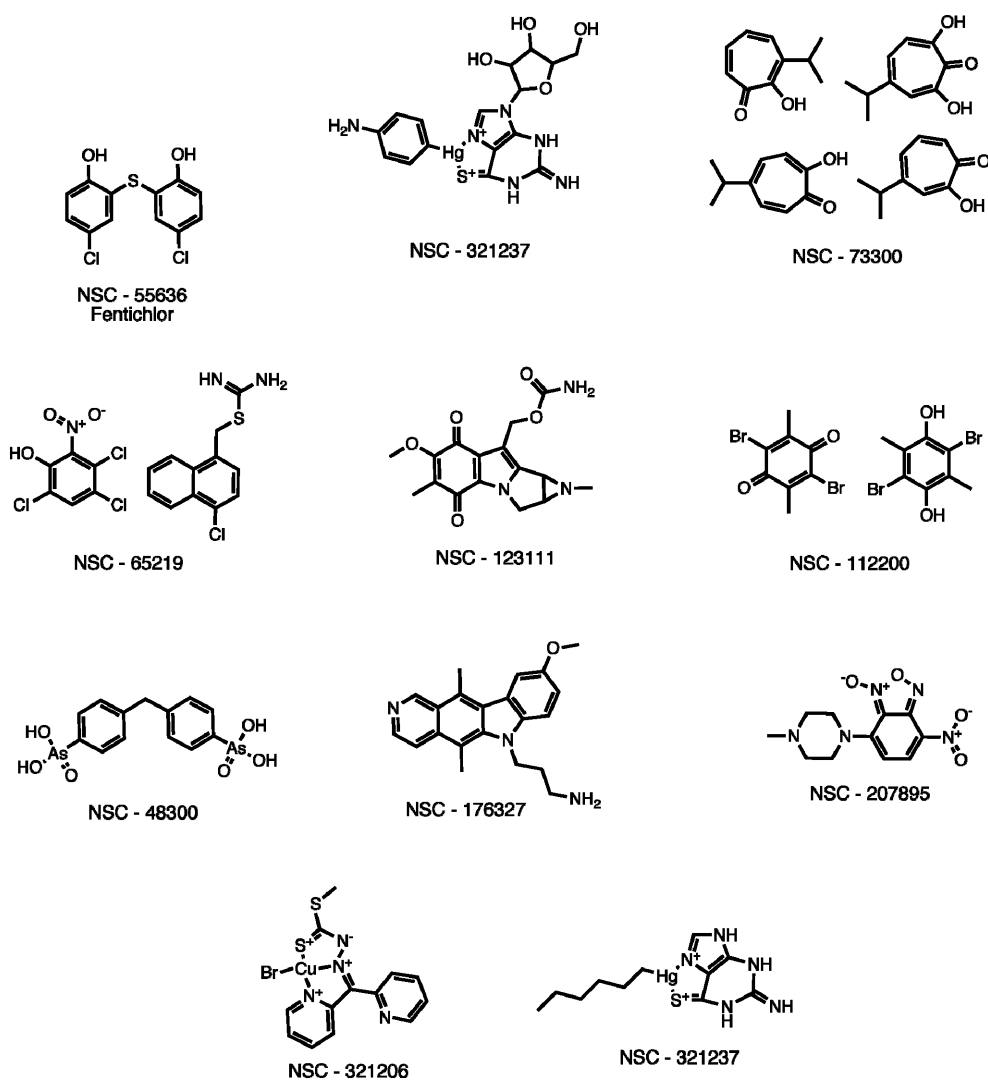

**Supplementary Figure S2:** Structures of Biofilm Inhibitors from the NCI Structural Diversity Set.

**Structural Diversity Set Biofilm Inhibitors:**

**Normalized Percent Biofilm Less than 0.2  
Normalized OD More than 0.7**

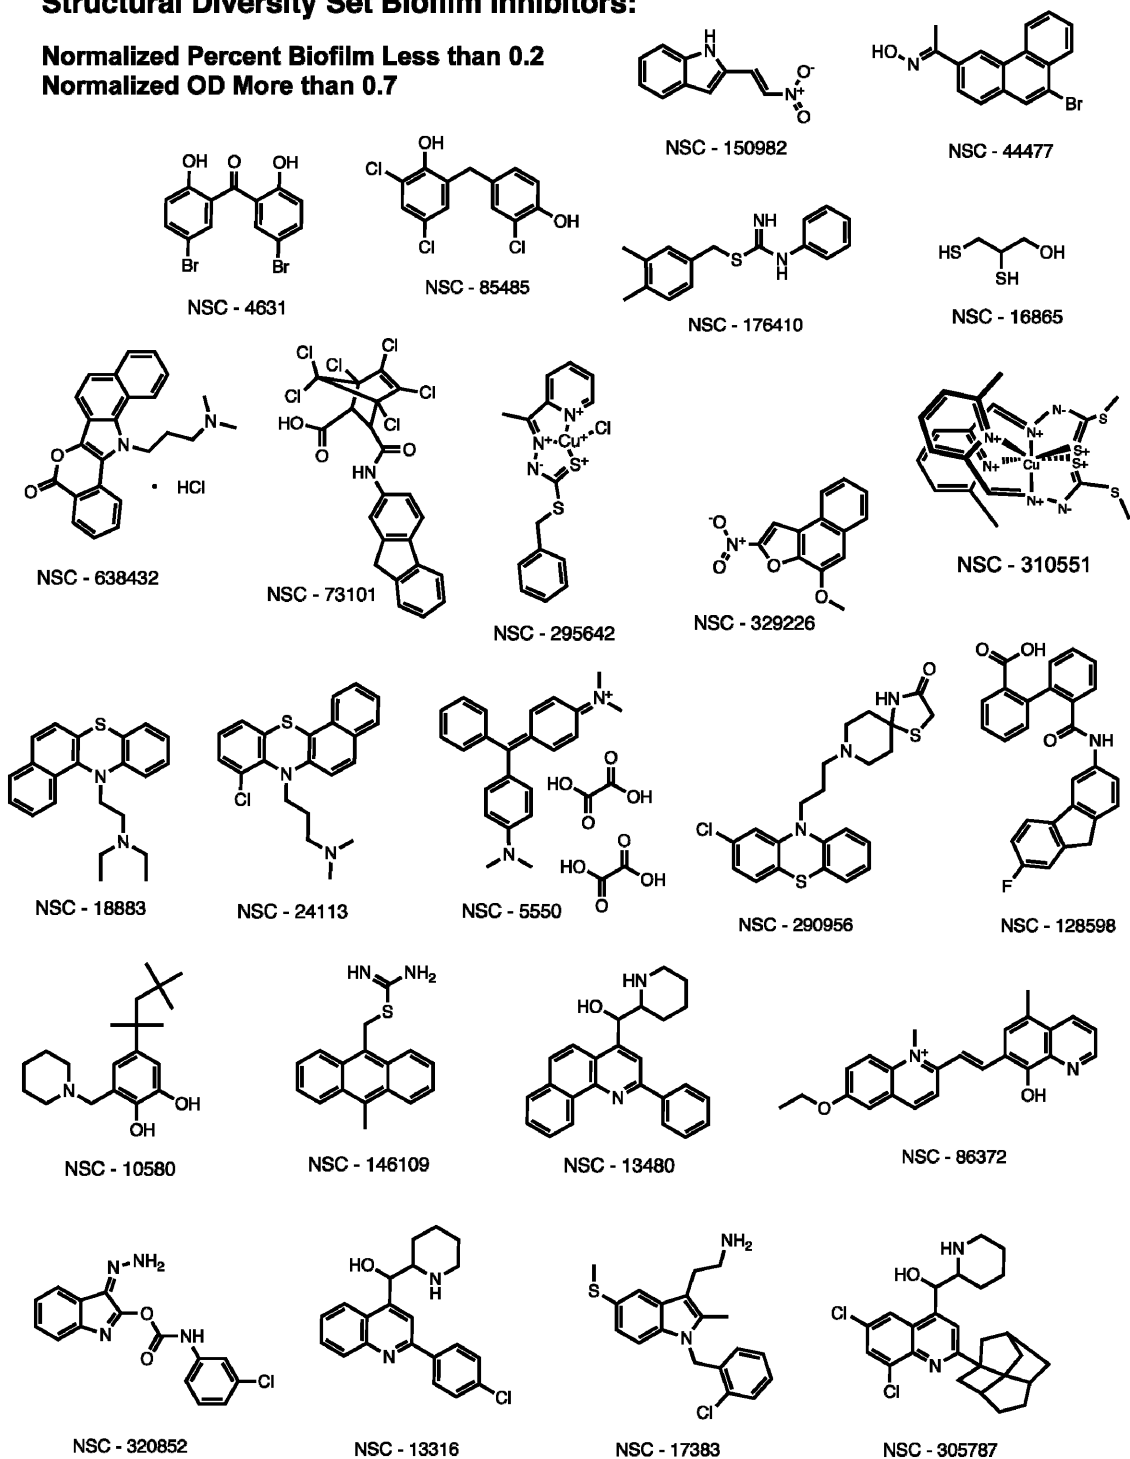

**Supplementary Figure S3:** Plot of Screening Results for the NCI Structural Diversity Set.

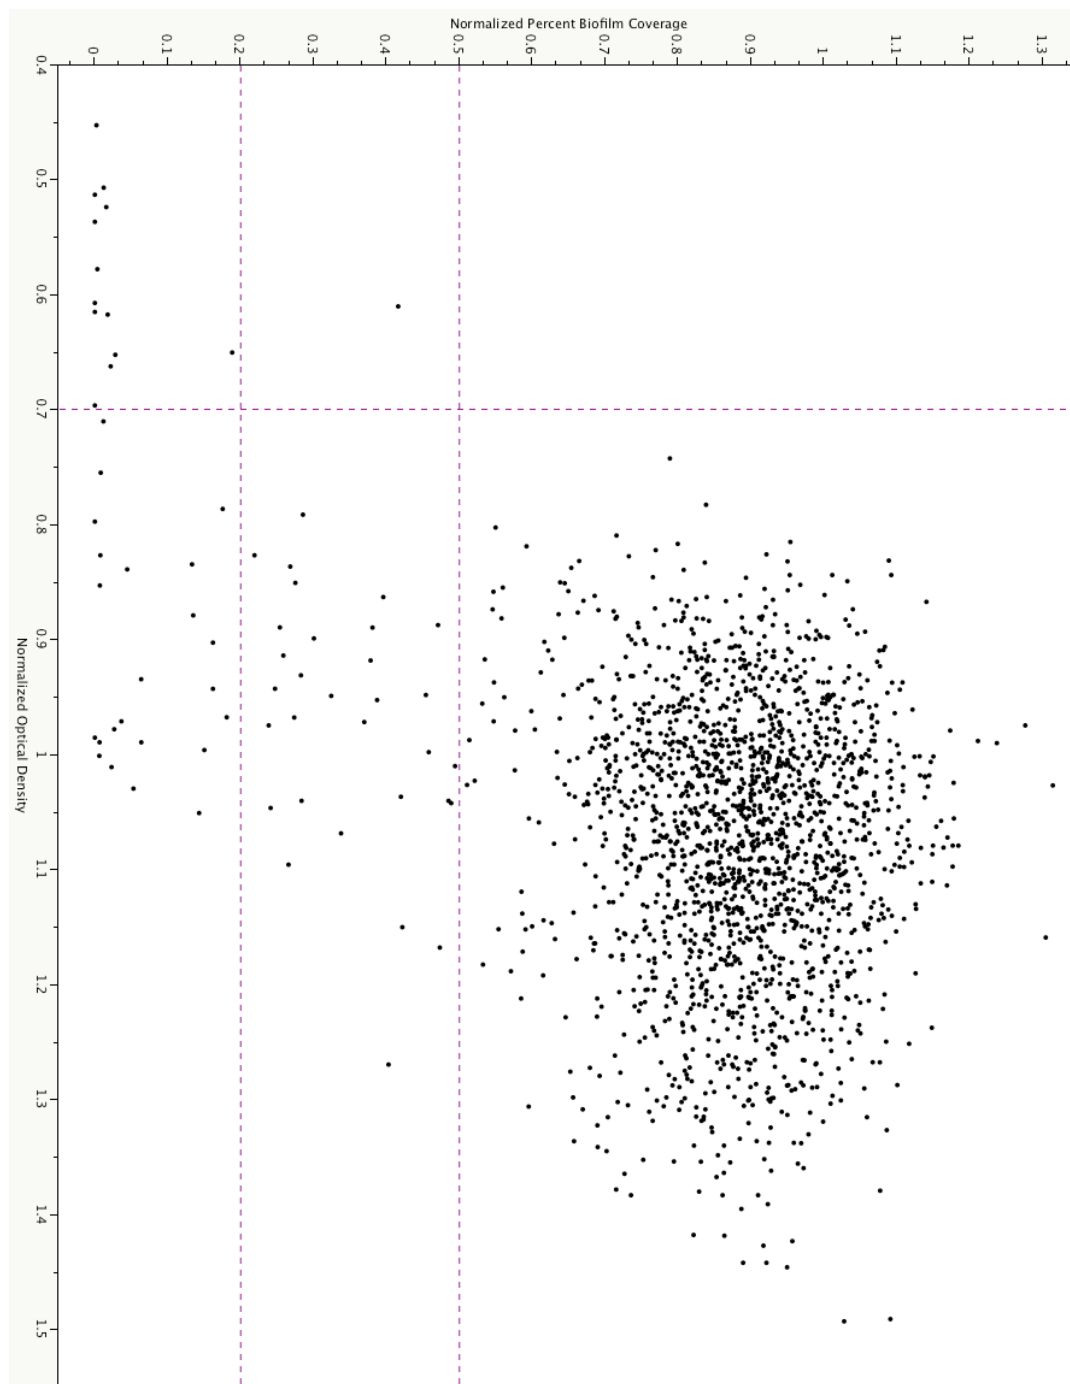

**Supplementary Table S2:** Table of Hits for the NCI Structural Diversity Set.

| Structural Diversity Set Hits       |       |                    |                                                 |       |                    |
|-------------------------------------|-------|--------------------|-------------------------------------------------|-------|--------------------|
| Normalized % biofilm coverage < 0.2 |       |                    | Normalized % biofilm coverage < 0.5, > than 0.2 |       |                    |
| NSC                                 | OD    | % Biofilm Coverage | NSC                                             | OD    | % Biofilm Coverage |
| 4631                                | 0.986 | 0.000              | 92585                                           | 0.827 | 0.219              |
| 320852                              | 0.798 | 0.000              | 177407                                          | 0.975 | 0.238              |
| 55636                               | 0.513 | 0.000              | 17600                                           | 1.047 | 0.241              |
| 123111                              | 0.697 | 0.000              | 205842                                          | 0.943 | 0.247              |
| 268879                              | 0.608 | 0.000              | 97345                                           | 0.890 | 0.254              |
| 321206                              | 0.615 | 0.000              | 2805                                            | 0.914 | 0.259              |
| 321237                              | 0.537 | 0.000              | 159628                                          | 1.096 | 0.266              |
| 321239                              | 0.453 | 0.002              | 65238                                           | 0.837 | 0.268              |
| 176327                              | 0.578 | 0.003              | 19630                                           | 0.968 | 0.273              |
| 310551                              | 1.001 | 0.006              | 48171                                           | 0.851 | 0.275              |
| 290956                              | 0.990 | 0.006              | 309881                                          | 0.931 | 0.283              |
| 17385                               | 0.853 | 0.007              | 228148                                          | 1.041 | 0.284              |
| 305787                              | 0.827 | 0.008              | 40787                                           | 0.792 | 0.285              |
| 146109                              | 0.755 | 0.008              | 169804                                          | 0.899 | 0.300              |
| 16865                               | 0.711 | 0.012              | 77552                                           | 0.949 | 0.324              |
| 48300                               | 0.507 | 0.012              | 117028                                          | 1.069 | 0.338              |
| 329226                              | 0.524 | 0.016              | 48881                                           | 0.972 | 0.370              |
| 112200                              | 0.618 | 0.018              | 40792                                           | 0.918 | 0.378              |
| 207895                              | 0.663 | 0.022              | 169466                                          | 0.890 | 0.381              |
| 128598                              | 1.011 | 0.023              | 48708                                           | 0.953 | 0.387              |
| 13480                               | 0.978 | 0.027              | 371777                                          | 0.863 | 0.396              |
| 73300                               | 0.653 | 0.028              | 96255                                           | 1.270 | 0.403              |
| 86372                               | 1.728 | 0.028              | 121145                                          | 0.611 | 0.416              |
| 85485                               | 0.971 | 0.036              | 69575                                           | 1.037 | 0.420              |
| 10580                               | 0.839 | 0.044              | 150432                                          | 1.150 | 0.422              |
| 348401                              | 1.030 | 0.053              | 322661                                          | 0.948 | 0.454              |
| 24113                               | 0.935 | 0.064              | 77554                                           | 0.998 | 0.458              |
| 5550                                | 0.990 | 0.064              | 35950                                           | 0.888 | 0.471              |
| 638432                              | 0.835 | 0.133              | 201868                                          | 1.168 | 0.473              |
| 13316                               | 0.879 | 0.135              | 403822                                          | 1.041 | 0.485              |
| 44477                               | 1.051 | 0.143              | 35489                                           | 1.043 | 0.489              |
| 295642                              | 0.996 | 0.150              | 306960                                          | 1.010 | 0.494              |
| 73101                               | 0.943 | 0.162              |                                                 |       |                    |
| 18883                               | 0.903 | 0.162              |                                                 |       |                    |
| 150982                              | 0.787 | 0.175              |                                                 |       |                    |
| 176410                              | 0.968 | 0.181              |                                                 |       |                    |
| 65219                               | 0.651 | 0.188              |                                                 |       |                    |

**Supplementary Figure S4:** Structures of Antibiotic Leads and Biofilm Inhibitors from the NCI Natural Products Set.

## Natural Products Set

### Antibiotics:

**Normalized Percent Biofilm Less than 0.2**  
**Normalized OD Less than 0.7**

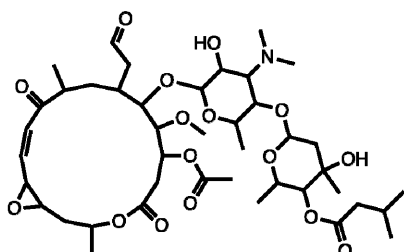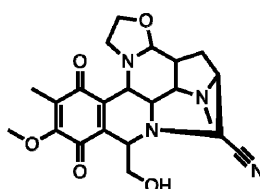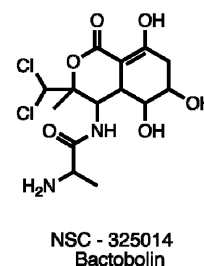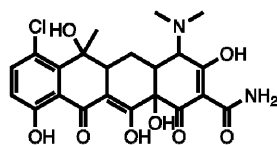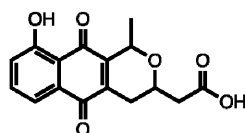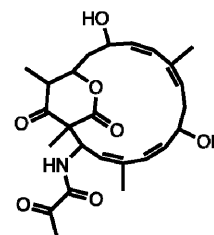

---

### Biofilm inhibitors:

**Normalized Percent Biofilm Less than 0.2**  
**Normalized OD More than 0.7**

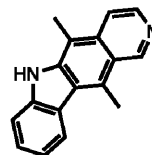



**Supplementary Figure S5:** Plot of Screening Results for the NCI Structural Diversity Set.

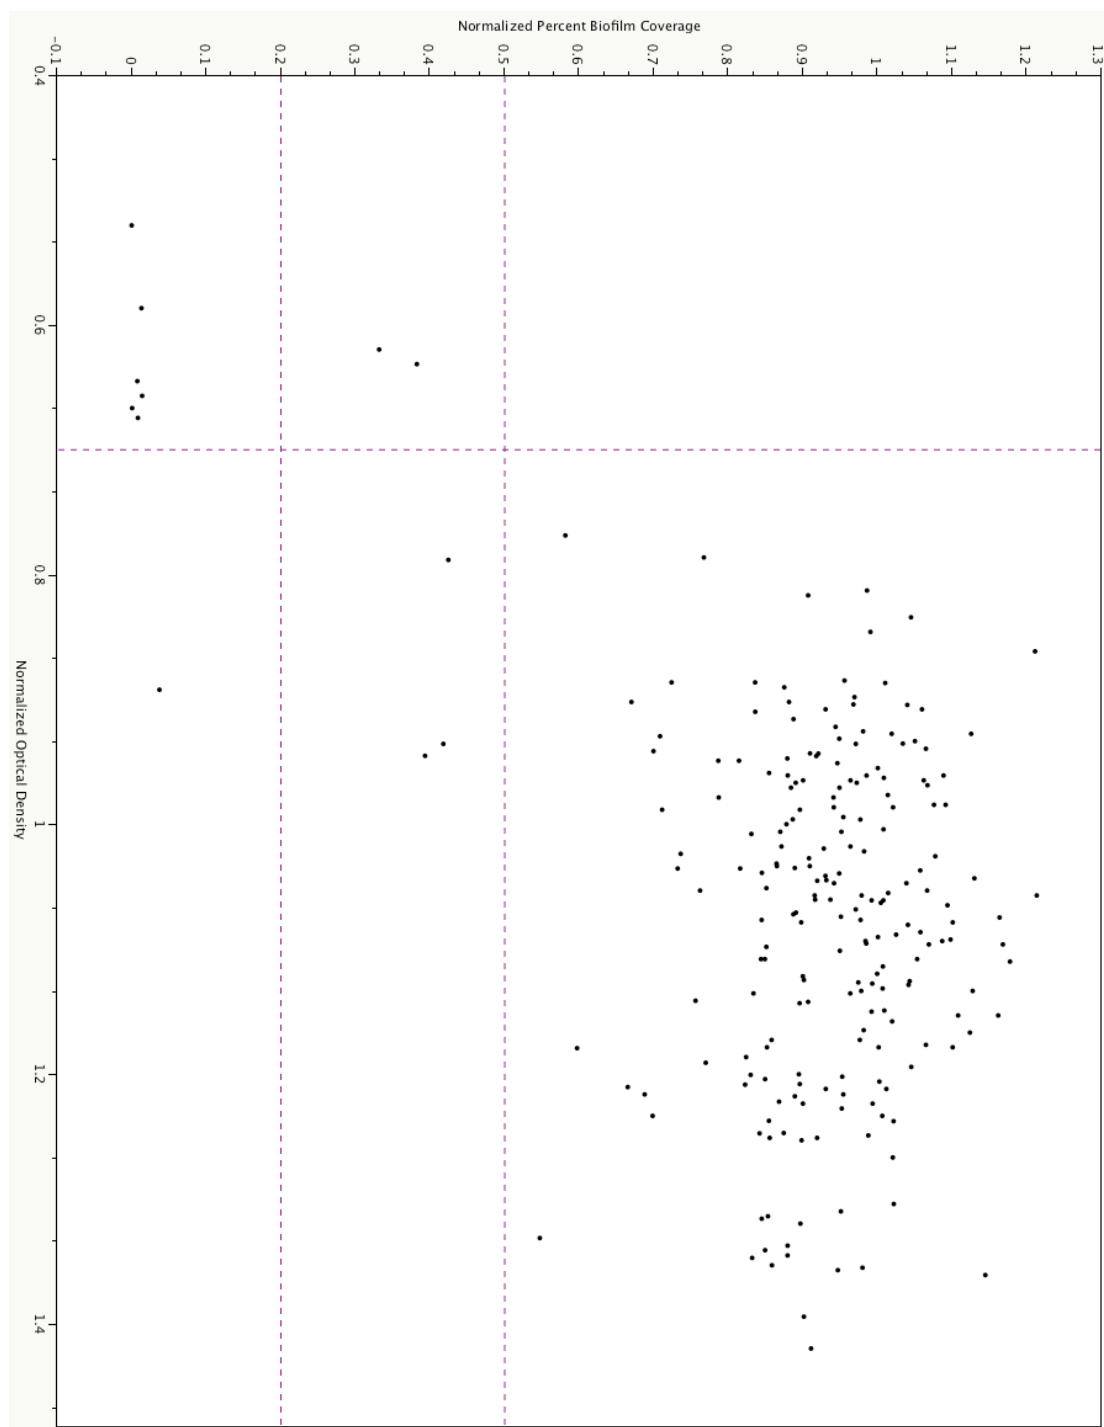

**Supplementary Table S3:** Table of Hits for the NCI Natural Products Set.

| Natural Product Set Hits           |          |                                |
|------------------------------------|----------|--------------------------------|
| Normalized % biofilm less than 0.2 |          |                                |
| NSC                                | Norm. OD | Norm. Percent Biofilm Coverage |
| 13252                              | 0.520    | 0.000                          |
| 267461                             | 0.667    | 0.001                          |
| 325014                             | 0.645    | 0.008                          |
| 145118                             | 0.675    | 0.008                          |
| 51001                              | 0.587    | 0.013                          |
| 349644                             | 0.657    | 0.014                          |
| 71795                              | 0.892    | 0.037                          |

  

| Normalized % biofilm less than 0.5, greater than 0.2 |          |                                |
|------------------------------------------------------|----------|--------------------------------|
| NSC                                                  | Norm. OD | Norm. Percent Biofilm Coverage |
| 45383                                                | 0.620    | 0.332                          |
| 526417                                               | 0.631    | 0.382                          |
| 312033                                               | 0.945    | 0.393                          |
| 180973                                               | 0.936    | 0.418                          |
| 106408                                               | 0.788    | 0.424                          |
| 177406                                               | 1.889    | 0.445                          |

**Supplementary Figure S6:** Structures of Antibiotic Leads and Biofilm Inhibitors from the NCI Mechanistic Set.

## Mechanistic Set

### Antibiotics:

Normalized Percent Biofilm Less than 0.2  
Normalized OD Less than 0.7

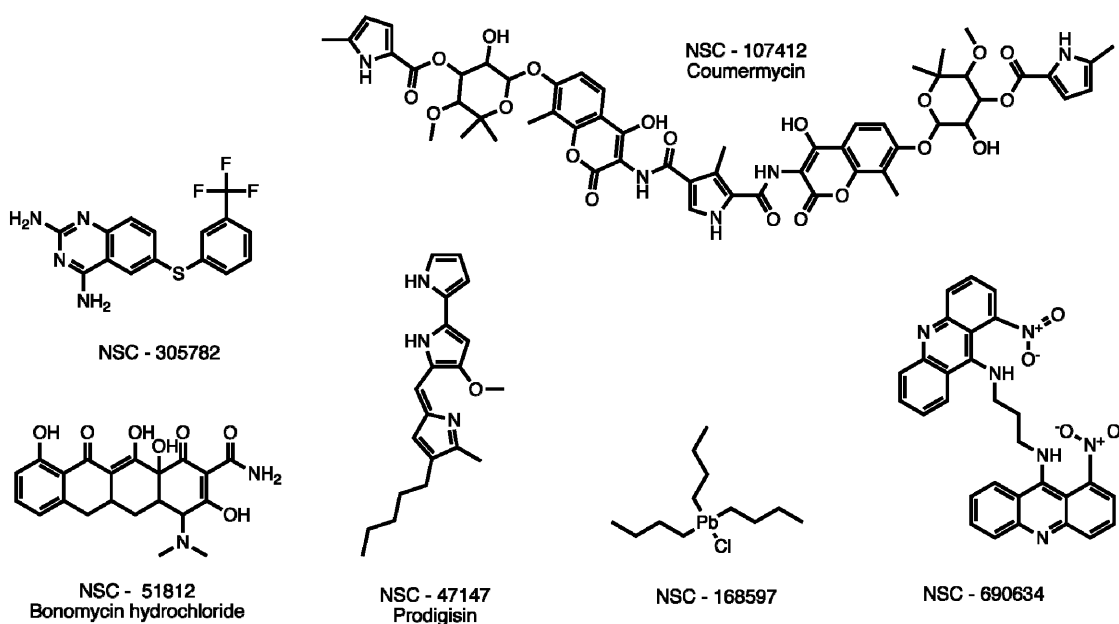

### Biofilm inhibitors:

Normalized Percent Biofilm Less than 0.2  
Normalized OD More than 0.7

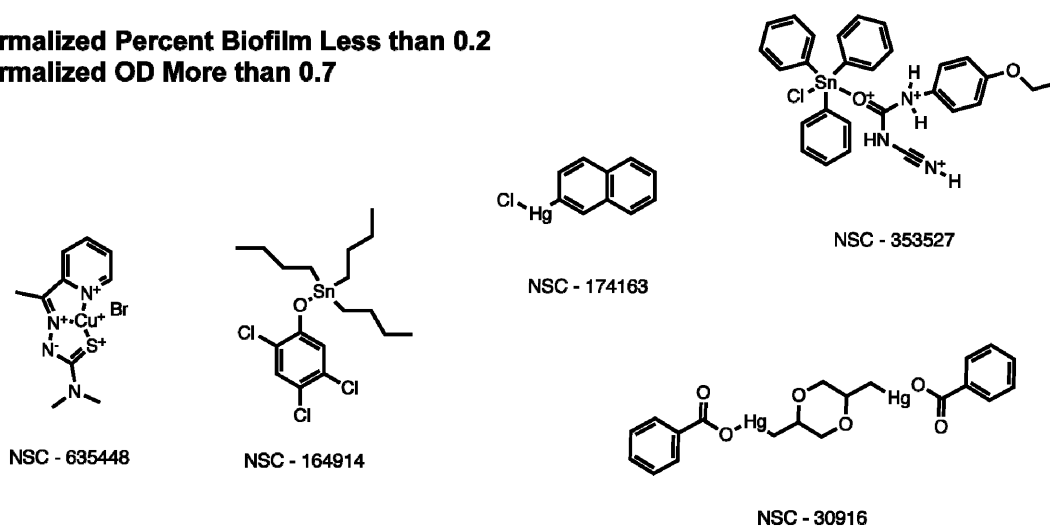

**Supplementary Figure S7:** Plot of Screening Results for the NCI Mechanistic Set.

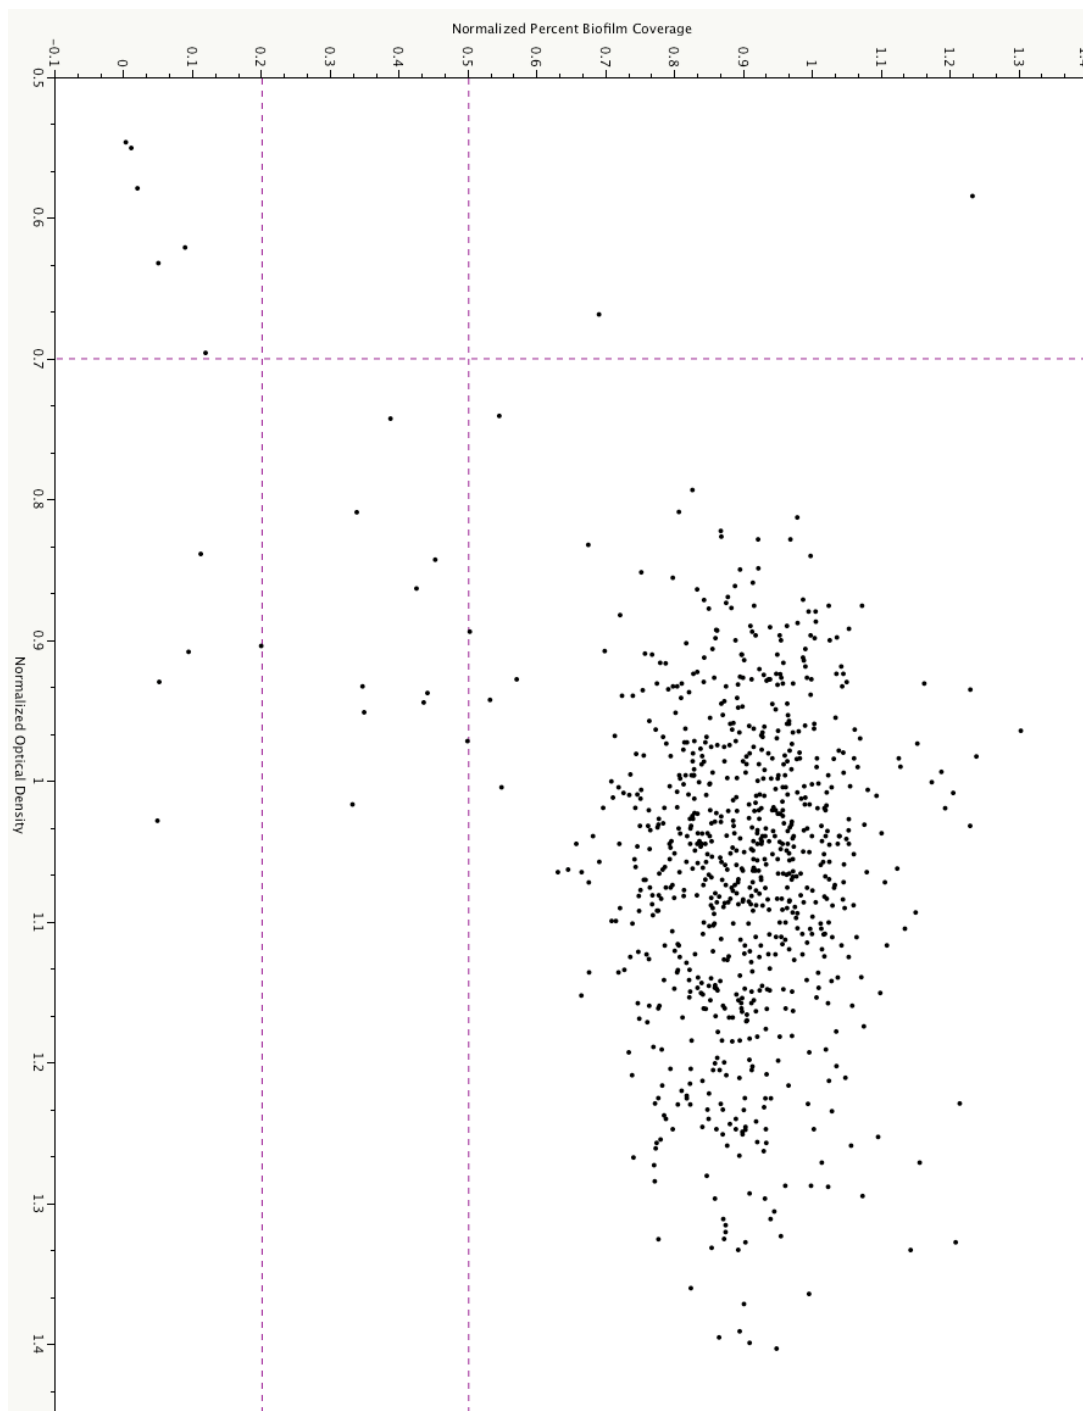

**Supplementary Table S4:** Table of Hits for the NCI Mechanistic Set.

|                             |
|-----------------------------|
| <b>Mechanistic Set Hits</b> |
|-----------------------------|

| <b>Normalized % biofilm less than 0.2</b> |          |                                |
|-------------------------------------------|----------|--------------------------------|
| NSC                                       | Norm. OD | Norm. Percent Biofilm Coverage |
| 168597                                    | 0.546152 | 0.002056                       |
| 305782                                    | 0.550243 | 0.009938                       |
| 51812                                     | 0.57888  | 0.01893                        |
| 353527                                    | 1.028193 | 0.047967                       |
| 47147                                     | 0.632063 | 0.049282                       |
| 164914                                    | 0.929574 | 0.05057                        |
| 107412                                    | 0.620934 | 0.088093                       |
| 174163                                    | 0.908208 | 0.093183                       |
| 635448                                    | 0.83866  | 0.110862                       |
| 690634                                    | 0.695811 | 0.117842                       |
| 30916                                     | 0.904006 | 0.198673                       |

| <b>Normalized % biofilm less than 0.5, greater than 0.2</b> |          |                                |
|-------------------------------------------------------------|----------|--------------------------------|
| NSC                                                         | Norm. OD | Norm. Percent Biofilm Coverage |
| 631529                                                      | 1.01662  | 0.331247                       |
| 253995                                                      | 0.80904  | 0.337428                       |
| 313981                                                      | 0.932754 | 0.345839                       |
| 618332                                                      | 0.951163 | 0.348146                       |
| 329279                                                      | 0.742521 | 0.386434                       |
| 631521                                                      | 0.863206 | 0.424164                       |
| 96932                                                       | 0.944184 | 0.434672                       |
| 697923                                                      | 0.937451 | 0.440122                       |
| 44690                                                       | 0.842751 | 0.45136                        |
| 634503                                                      | 0.971619 | 0.498237                       |

**Supplementary Figure S8:** Structures of Antibiotic Leads and Biofilm Inhibitors from the NCI Challenge Set.

## Challenge Set

### Antibiotics:

Normalized Percent Biofilm Less than 0.2  
Normalized OD Less than 0.7

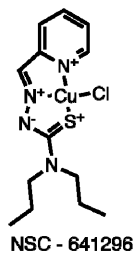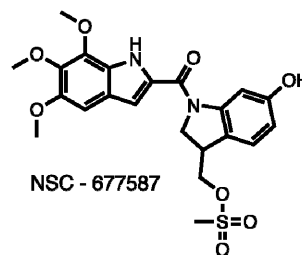

---

### Biofilm inhibitors:

Normalized Percent Biofilm Less than 0.2  
Normalized OD More than 0.7

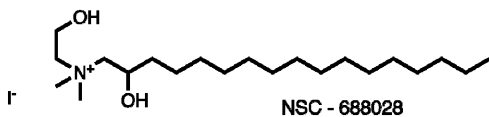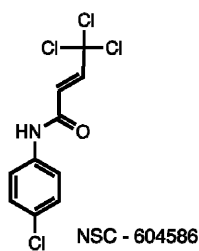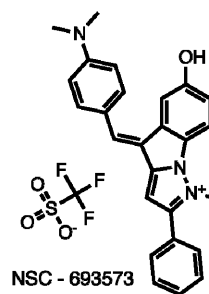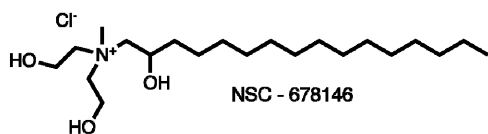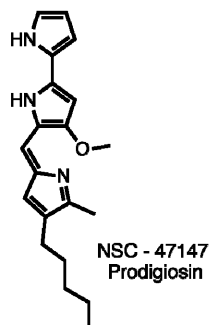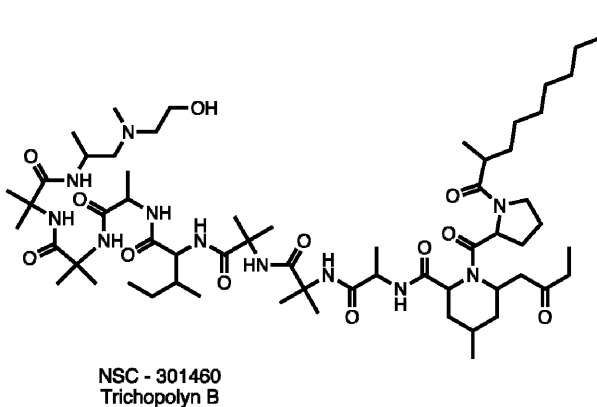

**Supplementary Figure S9:** Plot of Screening Results for the NCI Challenge Set.

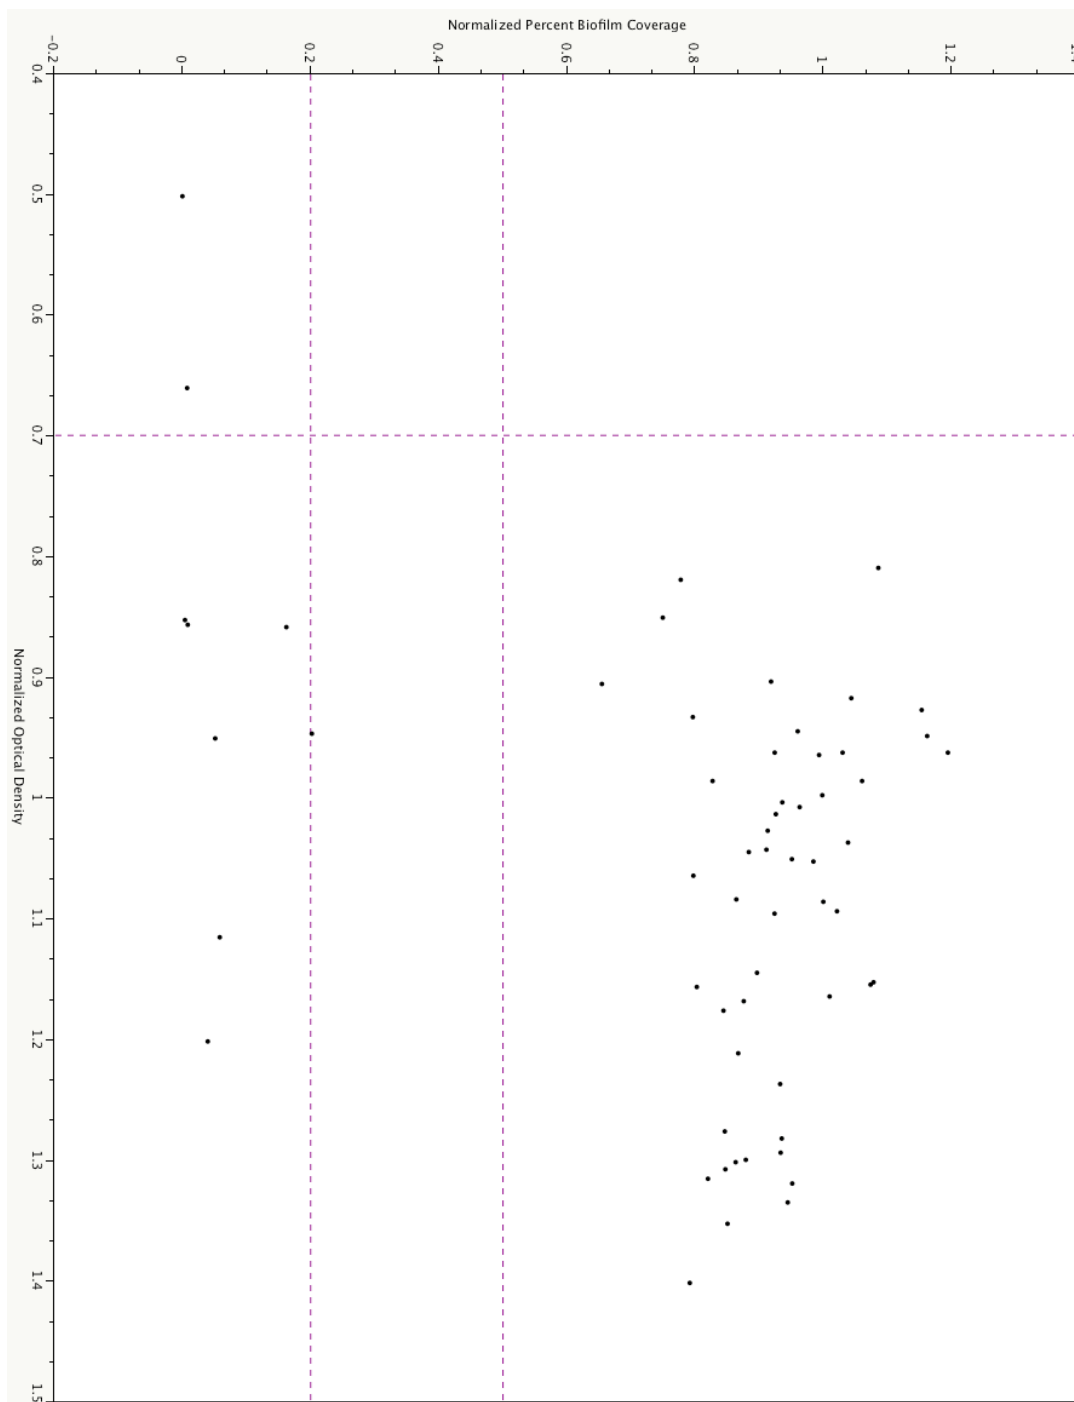

**Supplementary Table S5:** Table of Hits for the NCI Challenge Set.

|                           |
|---------------------------|
| <b>Challenge Set Hits</b> |
|---------------------------|

| <b>Normalized % biofilm less than 0.2</b> |          |                                |
|-------------------------------------------|----------|--------------------------------|
| NSC                                       | Norm. OD | Norm. Percent Biofilm Coverage |
| 641296                                    | 0.502    | 0.000                          |
| 47147                                     | 0.859    | 0.004                          |
| 677587                                    | 0.661    | 0.007                          |
| 688028                                    | 0.857    | 0.008                          |
| 301460                                    | 1.202    | 0.040                          |
| 678146                                    | 0.951    | 0.051                          |
| 693573                                    | 1.116    | 0.058                          |
| 604586                                    | 0.859    | 0.162                          |

| <b>Normalized % biofilm less than 0.5, greater than 0.2</b> |          |                                |
|-------------------------------------------------------------|----------|--------------------------------|
| NSC                                                         | Norm. OD | Norm. Percent Biofilm Coverage |
| 170984                                                      | 0.947    | 0.202                          |



**Supplementary Figure S10:** Substructure Search Results of the Mefloquine-Like Query Structure for all NCI Libraries.

**Substructure Search of Four NCI Libraries:**

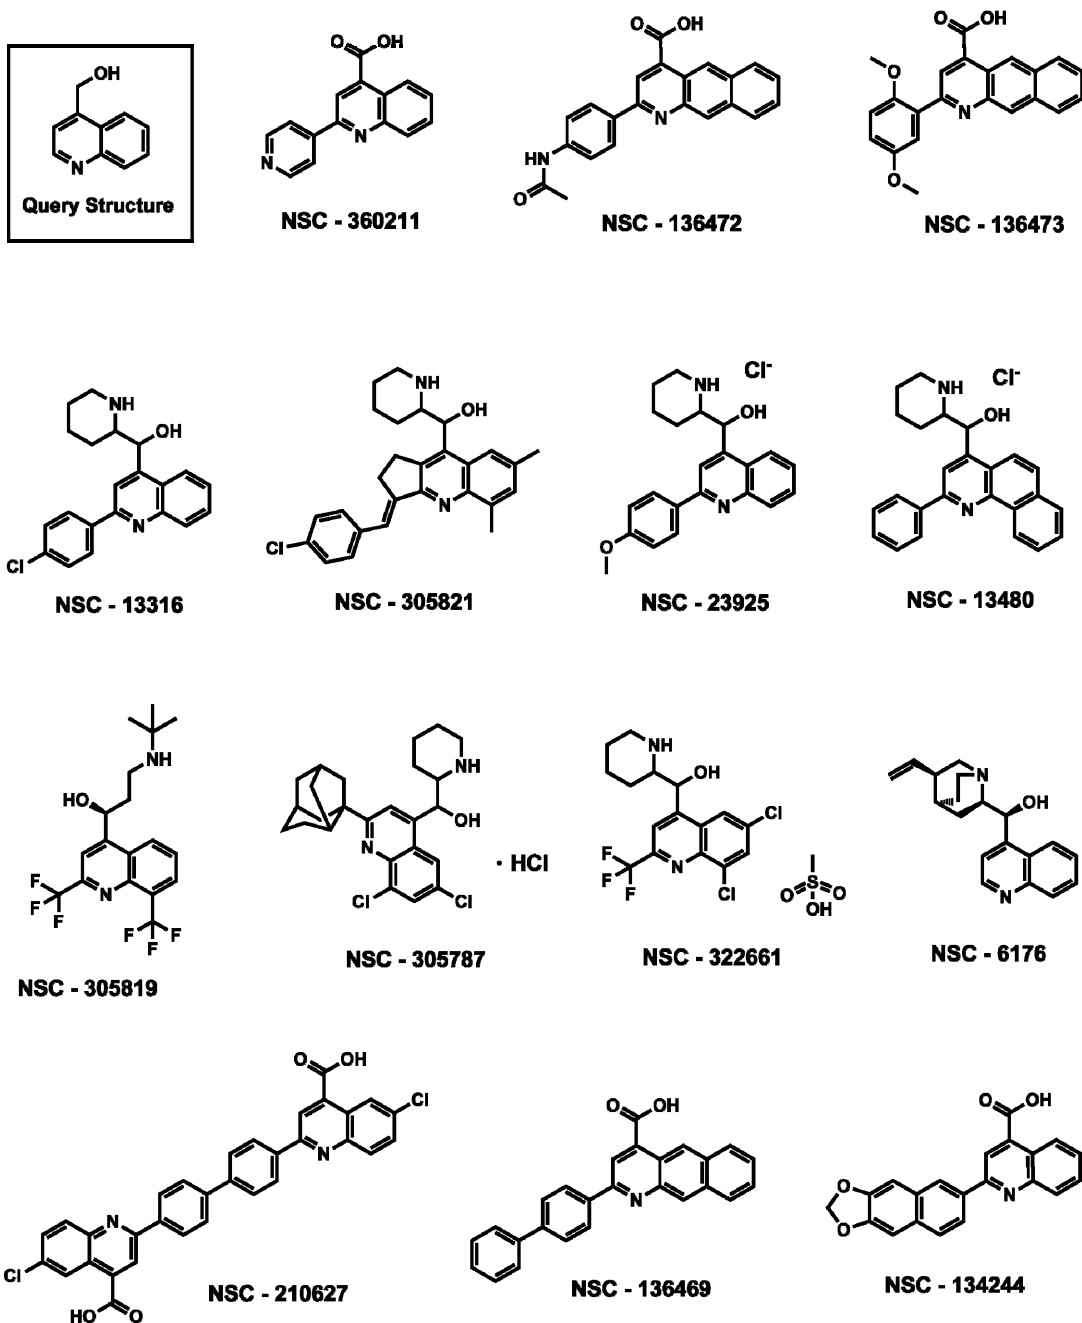

**Supplementary Figure S11:** Plot of Screening Results for Substructure Search Compounds.

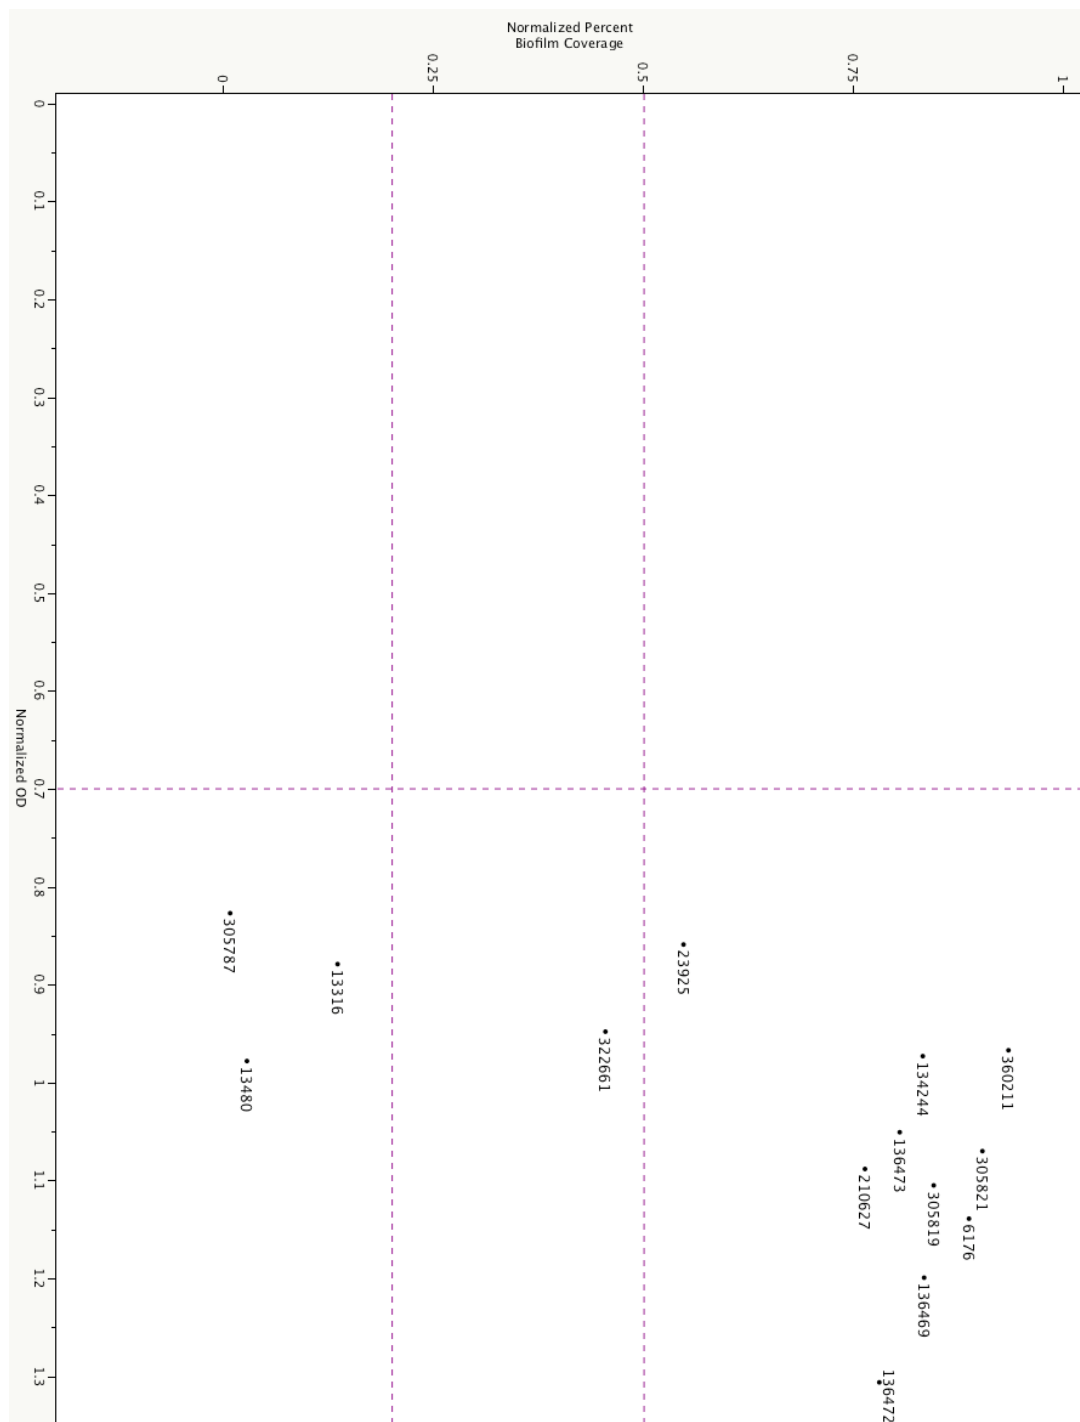

**Supplementary Table S6:** Table of Hits from the Substructure Search Results  
Compound Set.

| Screening Data For Substructure Search Results |                                     |               |
|------------------------------------------------|-------------------------------------|---------------|
| NSC                                            | Normalized Percent Biofilm Coverage | Normalized OD |
| 360211                                         | 0.934                               | 0.967         |
| 6176                                           | 0.887                               | 1.139         |
| 13316                                          | 0.135                               | 0.879         |
| 134244                                         | 0.832                               | 0.973         |
| 23925                                          | 0.547                               | 0.859         |
| 136472                                         | 0.780                               | 1.306         |
| 136473                                         | 0.805                               | 1.051         |
| 136469                                         | 0.834                               | 1.199         |
| 13480                                          | 0.027                               | 0.978         |
| 305821                                         | 0.903                               | 1.070         |
| 305787                                         | 0.007                               | 0.827         |
| 305819                                         | 0.845                               | 1.105         |
| 322661                                         | 0.454                               | 0.948         |
| 210627                                         | 0.763                               | 1.088         |
